# Supplementary material
Source: PubMed Central journal article supplement (PMC4803082)
Supplement: NIHMS739687-supplement-213_2015_4147_MOESM1_ESM.pdf [file NIHMS739687-supplement-213_2015_4147_MOESM1_ESM.pdf]

**Table S1.** Number of BXD mice from each strain tested on each of the eight cocaine doses (top) and carrying the B6 or D2 allele at each of the three QTL (bottom)

| Strain         | Cocaine dose (mg/kg/infusion) |              |            |             |             |             |            |            | Analysis |          |
|----------------|-------------------------------|--------------|------------|-------------|-------------|-------------|------------|------------|----------|----------|
|                | 0.032<br>m/f                  | 0.056<br>m/f | 0.1<br>m/f | 0.18<br>m/f | 0.32<br>m/f | 0.56<br>m/f | 1.0<br>m/f | 1.8<br>m/f | Acq.     | DR Curve |
| BXD1           | -/3                           | -/3          | -/3        | -/3         | -/3         | -/3         | -/3        | -/3        | yes      | yes      |
| BXD2           | -/-                           | -/-          | -/-        | -/-         | -/-         | 1/-         | 1/-        | 1/-        | yes      | -        |
| BXD9           | -/1                           | -/1          | -/1        | -/1         | -/1         | -/1         | -/1        | -/1        | yes      | yes      |
| BXD11          | 1/-                           | 1/-          | 1/-        | 1/-         | 1/-         | 1/-         | 1/-        | 1/-        | yes      | yes      |
| BXD13          | 1/-                           | 1/-          | 1/-        | 1/-         | 1/1         | 1/1         | 1/1        | 1/1        | yes      | yes      |
| BXD14          | -/2                           | -/4          | -/4        | -/4         | -/4         | -/4         | -/4        | -/4        | yes      | yes      |
| BXD15          | 1/-                           | 1/-          | 1/-        | 1/-         | 1/-         | 1/1         | 1/-        | 1/-        | yes      | yes      |
| BXD19          | -/-                           | -/-          | -/-        | -/-         | -/-         | 1/-         | -/-        | 1/-        | yes      | -        |
| BXD20          | 1/-                           | 1/-          | 1/-        | 1/-         | 1/-         | 1/-         | 1/-        | 1/-        | yes      | yes      |
| BXD27          | -/1                           | -/1          | -/1        | -/1         | -/1         | -/1         | -/1        | -/1        | yes      | yes      |
| BXD28          | -/-                           | -/-          | 1/-        | 1/-         | 1/-         | 1/-         | 1/-        | 1/-        | yes      | -        |
| BXD29          | 1/-                           | 1/-          | 1/-        | 1/-         | 1/-         | 1/-         | 1/-        | 1/-        | yes      | yes      |
| BXD31          | 1/-                           | 1/-          | 1/-        | 1/-         | 1/-         | 1/-         | 1/-        | 1/-        | yes      | yes      |
| BXD32          | 2/-                           | 2/-          | 2/-        | 2/-         | 2/-         | 2/-         | 2/-        | 2/-        | yes      | yes      |
| BXD33          | 1/-                           | 1/-          | 1/-        | 2/-         | 2/-         | 2/-         | 2/-        | 2/-        | yes      | yes      |
| BXD34          | 3/2                           | 3/2          | 3/2        | 3/2         | 3/2         | 3/2         | 3/2        | 3/2        | yes      | yes      |
| BXD39          | 2/-                           | 2/-          | 2/-        | 2/-         | 2/-         | 2/-         | 2/-        | 2/-        | yes      | yes      |
| BXD40          | 1/2                           | 1/2          | 1/2        | 1/2         | 1/2         | 1/2         | 1/2        | 1/2        | yes      | yes      |
| BXD43          | 1/-                           | 2/-          | 2/-        | 2/-         | 2/-         | 2/-         | 2/-        | 2/-        | yes      | yes      |
| BXD50          | -/1                           | -/1          | -/1        | -/1         | -/1         | 1/1         | -/1        | -/1        | yes      | yes      |
| BXD55          | -/-                           | -/-          | -/-        | 2/1         | 2/1         | 2/2         | 2/1        | 2/1        | yes      | -        |
| BXD56          | 2/-                           | 3/-          | 3/-        | 3/-         | 3/-         | 3/-         | 3/-        | 3/-        | yes      | yes      |
| BXD61          | 3/-                           | 4/-          | 4/-        | 4/1         | 4/1         | 5/1         | 4/1        | 5/1        | yes      | yes      |
| BXD62          | -/-                           | -/-          | -/-        | 1/-         | 1/-         | 1/1         | 1/1        | 1/1        | yes      | -        |
| BXD63          | 2/-                           | 2/-          | 2/-        | 2/-         | 2/-         | 2/-         | 2/-        | 2/-        | yes      | yes      |
| BXD65          | -/-                           | -/-          | -/-        | 2/-         | 2/-         | 2/-         | 2/-        | 2/-        | yes      | -        |
| BXD65b (BXD92) | -/1                           | 1/1          | 1/1        | 1/1         | 1/2         | 2/1         | 1/2        | 2/1        | yes      | yes      |
| BXD69          | 2/-                           | 2/-          | 2/-        | 2/1         | 2/-         | 2/1         | 2/-        | 2/1        | yes      | yes      |
| BXD70          | -/1                           | -/1          | -/1        | -/1         | -/1         | 1/1         | -/1        | -/1        | yes      | yes      |
| BXD71          | -/-                           | -/-          | -/-        | -/2         | -/2         | -/2         | -/2        | -/2        | yes      | -        |
| BXD73a (BXD80) | -/-                           | -/-          | -/-        | -/2         | -/2         | -/2         | -/2        | -/2        | yes      | -        |
| BXD75          | -/2                           | -/2          | -/2        | -/2         | -/2         | -/2         | -/2        | -/2        | yes      | yes      |
| BXD77          | 1/-                           | 2/1          | 2/1        | 2/1         | 2/1         | 2/2         | 2/2        | 2/2        | yes      | yes      |
| BXD83          | -/-                           | -/-          | -/1        | -/1         | -/1         | -/1         | -/1        | -/1        | yes      | -        |
| BXD86          | -/-                           | -/-          | -/-        | -/-         | -/-         | -/1         | -/-        | -/-        | yes      | -        |
| BXD90          | 3/-                           | 3/-          | 3/-        | 3/-         | 3/-         | 3/-         | 3/-        | 3/-        | yes      | yes      |
| BXD98          | -/1                           | -/2          | -/2        | -/2         | -/2         | -/2         | -/2        | -/2        | yes      | yes      |
| BXD99          | -/1                           | -/1          | -/1        | -/1         | -/1         | -/1         | -/1        | -/1        | yes      | yes      |
| BXD100         | 2/1                           | 2/1          | 2/1        | 2/-         | 2/1         | 3/-         | 2/1        | 2/1        | yes      | yes      |
| Males/Females  | 31/19                         | 36/23        | 37/24      | 43/30       | 43/32       | 50/36       | 44/34      | 47/34      |          |          |
| All Mice       | 50                            | 59           | 61         | 73          | 75          | 86          | 78         | 81         |          |          |

**Allele at QTL peak**

**Chr 16 @ 86.457837 Mb - Acquisition**

|           |   |   |   |   |   |       |   |   |
|-----------|---|---|---|---|---|-------|---|---|
| B6 allele | - | - | - | - | - | 31/19 | - | - |
| D2 allele | - | - | - | - | - | 19/17 | - | - |

**Chr 11 @ 47.930883 Mb - IAL**

|           |       |       |       |       |       |       |       |       |
|-----------|-------|-------|-------|-------|-------|-------|-------|-------|
| B6 allele | 16/9  | 19/10 | 19/10 | 20/12 | 20/11 | 23/14 | 20/12 | 21/13 |
| D2 allele | 15/10 | 17/13 | 17/13 | 17/12 | 17/15 | 19/13 | 17/15 | 18/14 |

**Chr 7 @ 31.220796 Mb - CAL**

|           |       |       |       |       |       |       |       |       |
|-----------|-------|-------|-------|-------|-------|-------|-------|-------|
| B6 allele | 22/13 | 24/13 | 24/13 | 25/14 | 25/16 | 29/16 | 25/16 | 27/16 |
| D2 allele | 9/6   | 12/10 | 12/10 | 12/10 | 12/10 | 13/11 | 12/11 | 12/11 |

**Table S2.** Heritability of intravenous cocaine self-administration phenotypes

| Phenotype                        | Heritability <sup>1</sup> |
|----------------------------------|---------------------------|
| Sessions to acquire cocaine IVSA | 0.28                      |
| Infusions (0.032 mg/kg/infusion) | 0.48                      |
| Infusions (0.056 mg/kg/infusion) | 0.58                      |
| Infusions (0.1 mg/kg/infusion)   | 0.47                      |
| Infusions (0.18 mg/kg/infusion)  | 0.46                      |
| Infusions (0.32 mg/kg/infusion)  | 0.60                      |
| Infusions (0.56 mg/kg/infusion)  | 0.50                      |
| Infusions (1.0 mg/kg/infusion)   | 0.56                      |
| Infusions (1.8 mg/kg/infusion)   | 0.57                      |
| CAL index                        | 0.51                      |

<sup>1</sup> ratio of between-strain variance to total variance
