# Supplementary material
Source: PubMed Central journal article supplement (PMC4803082)
Supplement: NIHMS739687-supplement-213_2015_4147_MOESM2_ESM.pdf [file NIHMS739687-supplement-213_2015_4147_MOESM2_ESM.pdf]

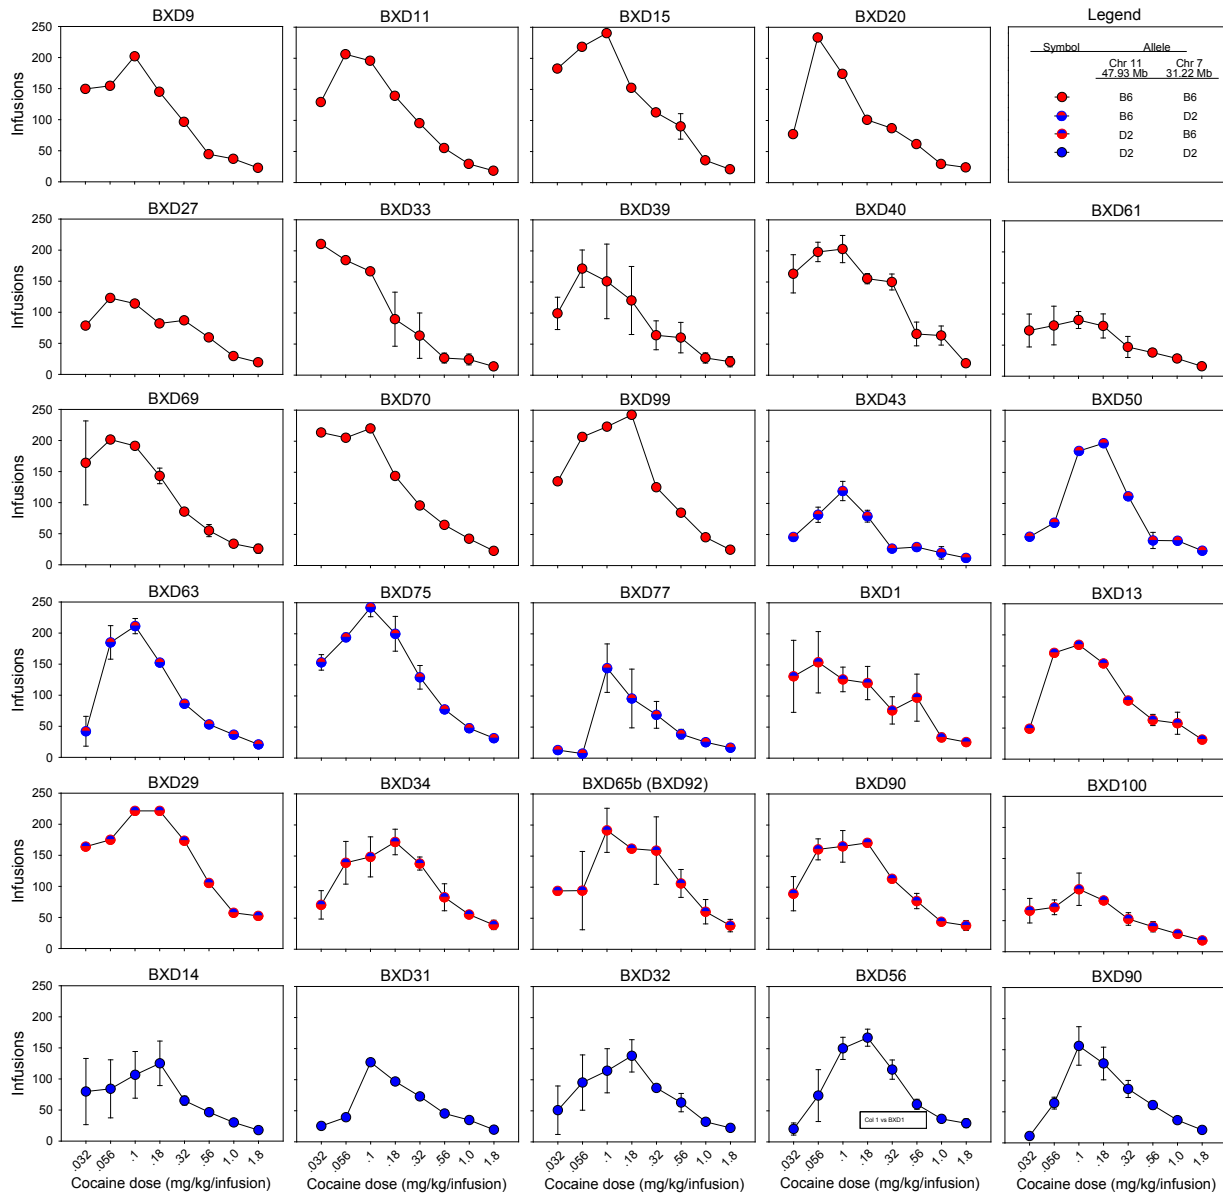

Figure S1. Cocaine IVSA dose-response curves of individual BXD strains. Strains are grouped by allele (B6 or D2) at the QTL associated with infusions on the ascending limb of the dose-response curve (IAL QTL, Chr 11 @ 47.93 Mb) and allele at the QTL associated with change in cocaine intake across the ascending limb of the dose-response curve (CAL QTL, Chr 7 @ 31.22 Mb). Data points represent mean  $\pm$  SE.
